# Supplementary material for: Development of an Effective Sonotrode Based Extraction Technique for the Recovery of Phenolic Compounds with Antioxidant Activities in Cherimoya Leaves
Source: MDPI journal article supplement (doi:10.3390/plants11152034), 2022-08-04

**Supplementary Table S1.** Correlation analysis of phenolic content and antioxidant activities of Cherimoya leaf extracts.

|                                                                    | DPPH   | ABTS   | FRAP  |
|--------------------------------------------------------------------|--------|--------|-------|
| Caffeoyl-glucaric acid derivative I                                | -0.58  | -0.23  | 0.02  |
| Caffeoyl-glucaric acid derivative II                               | 0.65   | 0.81*  | 0.85* |
| p-Coumaroylglucaric acid derivative                                | 0.52   | 0.72*  | 0.79* |
| Catechin                                                           | 0.04   | -0.13  | -0.29 |
| Chlorogenic acid I                                                 | 0.37   | 0.53   | 0.60  |
| Chlorogenic acid II                                                | 0.25   | -0.11  | -0.35 |
| Chlorogenic acid III                                               | 0.22   | 0.23   | 0.01  |
| Epicatechin                                                        | 0.30   | 0.15   | 0.01  |
| Quercetin 3-O-rutinoside-7-O-glucoside I                           | 0.25   | 0.44   | 0.55  |
| Procyanidin dimer type B                                           | 0.57   | 0.73*  | 0.75* |
| Quercetin 3-O-rutinoside-7-O-glucoside II                          | -0.23  | -0.05  | 0.08  |
| 5-p-Coumaroylquinic acid I                                         | 0.43   | 0.53   | 0.56  |
| 5-p-Coumaroylquinic acid II                                        | 0.43   | 0.26   | 0.09  |
| Procyanidin trimer type B                                          | 0.44   | 0.31   | 0.13  |
| Procyanidin tetramer type B                                        | -0.68  | -0.43  | -0.25 |
| Calabricoside A I                                                  | -0.75* | -0.53  | -0.35 |
| Calabricoside A II                                                 | 0.07   | -0.11  | -0.30 |
| Rutin I                                                            | 0.28   | -0.06  | -0.34 |
| Rutin II                                                           | 0.75*  | 0.75*  | 0.54  |
| Quercetin hexoside                                                 | 0.53   | 0.28   | -0.05 |
| lathyroside-7-O- $\alpha$ -Lrhamnopyranoside isomer I              | 0.51   | 0.86*  | 0.93* |
| lathyroside-7-O- $\alpha$ -Lrhamnopyranoside isomer II             | -0.03  | -0.25  | -0.44 |
| Kaempferol 3-galactoside-7-rhamnoside                              | 0.17   | -0.13  | -0.43 |
| Kaempferol hexoside I                                              | -0.11  | 0.14   | 0.14  |
| Luteolin-3-Galactoside-7-Rhamnoside                                | -0.58  | -0.20  | 0.00  |
| Kaempferol hexoside II                                             | 0.43   | 0.51   | 0.47  |
| Quercetin hexose acetate                                           | 0.08   | 0.48   | 0.65  |
| Kaempferol 3-O- $\beta$ -D-(6'-O-p-coumaroyl) galactopyranoside I  | 0.84*  | 0.72*  | 0.52  |
| Kaempferol 3-O- $\beta$ -D-(6'-O-p-coumaroyl) galactopyranoside II | -0.91* | -0.71* | -0.53 |
| Flavonoids                                                         | 0.73*  | 0.89*  | 0.70  |
| Phenolic acid derivatives                                          | 0.44   | 0.18   | -0.06 |
| Sum of phenolic compounds                                          | 0.79*  | 0.82*  | 0.57  |

Results are expressed as Pearson correlation coefficients with indicated level of significance. \*  $p < 0.05$ ; DPPH= 2,2-diphenyl-1-picrylhydrazyl, FRAP= The ferric reducing antioxidant power; ABTS: 2,2'-azino-di (3-ethylbenzothiazoline)-6-sulfonic acid.

Supplementary Figure S1. Separation of proanthocyanidins by HPLC-FLD.

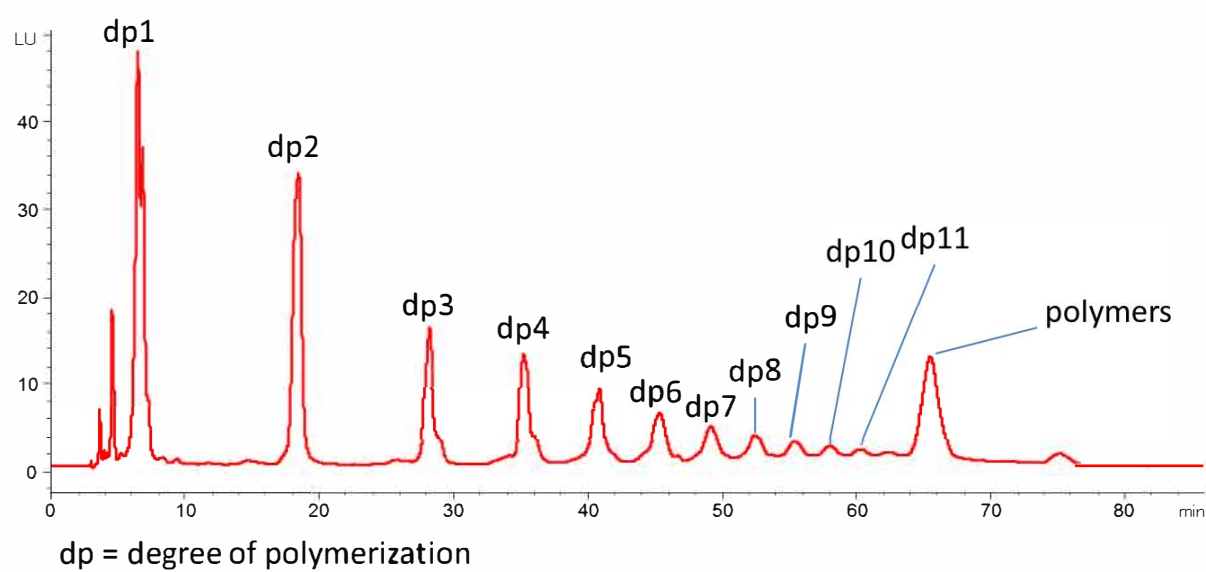

Supplement: s1 [file s1]
